# Supplementary material for: The Role of Serum and Urine CRP Levels in Predicting Pathology Results in Patients Undergoing Prostate Biopsy
Source: Research Square preprint supplement (doi:10.21203/rs.3.rs-6545712/v1), 2025-05-06
Supplement: Supplementary file 1 [file 2b6777285757f422ec2421db.docx]

|  |  |  |  |  |  |  |  |  |
| --- | --- | --- | --- | --- | --- | --- | --- | --- |
|  |  | Min-Max | | | Medyan | Avg.±ss/n-% | | |
| Age(year) | | 46.0 | - | 75.0 | 63.0 | 63.2 | ± | 6.3 |
| Height (cm) | | 102.0 | - | 188.0 | 170.0 | 171.1 | ± | 7.8 |
| Weight(kg) | | 55.0 | - | 145.0 | 80.0 | 80.4 | ± | 12.6 |
| BMI(kg/cm2) | | 15.9 | - | 81.7 | 26.7 | 27.6 | ± | 5.3 |
| Smoking | (-) |  |  |  |  | 152 |  | 60.6% |
| (+) |  |  |  |  | 98 |  | 39.0% |
| HT | (-) |  |  |  |  | 152 |  | 60.6% |
| (+) |  |  |  |  | 99 |  | 39.4% |
| CVD | (-) |  |  |  |  | 202 |  | 80.5% |
| (+) |  |  |  |  | 48 |  | 19.1% |
| COPD | (-) |  |  |  |  | 228 |  | 90.8% |
| (+) |  |  |  |  | 23 |  | 9.2% |
| DM | (-) |  |  |  |  | 214 |  | 85.3% |
| (+) |  |  |  |  | 35 |  | 13.9% |
| Others | (-) |  |  |  |  | 244 |  | 97.2% |
| (+) |  |  |  |  | 4 |  | 1.6% |
| PSA(ng/dl) | | 0.7 | - | 45141.0 | 6.0 | 366.1 | ± | 4017.0 |
| PV (cc) | | 15.0 | - | 225.0 | 50.0 | 55.9 | ± | 30.2 |
| Serum CRP(mg/L) | | 0.08 | - | 3.50 | 1.01 | 1.18 | ± | 0.59 |
| Urine CRP(mg/L) | | 0.10 | - | 3.67 | 1.12 | 1.19 | ± | 0.38 |

|  |  |  | PCa | | |  | Chronic Inflammation (NIH 4) | | |  | BPH | | | p | |
| --- | --- | --- | --- | --- | --- | --- | --- | --- | --- | --- | --- | --- | --- | --- | --- |
| Age(year) | Ort.±ss | | 63.6 | ± | 6.2 |  | 63.1 | ± | 6.3 |  | 62.9 | ± | 6.4 | 0.775 | K |
| Medyan | | 64.0 | | |  | 63.5 | | |  | 63.0 | | |
| Height(cm) | Ort.±ss | | 171.5 | ± | 9.6 |  | 170.8 | ± | 6.2 |  | 171.0 | ± | 6.9 | 0.350 | K |
| Medyan | | 171.5 | | |  | 170.0 | | |  | 170.0 | | |
| Weight(kg) | Ort.±ss | | 80.4 | ± | 11.9 |  | 80.0 | ± | 13.5 |  | 80.9 | ± | 12.6 | 0.870 | K |
| Medyan | | 79.0 | | |  | 78.5 | | |  | 80.0 | | |
| BMI(kg/cm2) | Ort.±ss | | 27.7 | ± | 7.1 |  | 27.4 | ± | 4.0 |  | 27.7 | ± | 4.0 | 0.699 | K |
| Medyan | | 26.5 | | |  | 26.6 | | |  | 27.0 | | |
| Smoking | (-) | n-% | 33 |  | 36.7% |  | 33 |  | 38.4% |  | 34 |  | 45.3% | 0.497 | X² |
| (+) | n-% | 57 |  | 63.3% |  | 53 |  | 61.6% |  | 41 |  | 54.7% |
| HT | (-) | n-% | 56 |  | 62.2% |  | 50 |  | 58.1% |  | 46 |  | 61.3% | 0.846 | X² |
| (+) | n-% | 34 |  | 37.8% |  | 36 |  | 41.9% |  | 29 |  | 38.7% |
| CVD | (-) | n-% | 69 |  | 76.7% |  | 72 |  | 83.7% |  | 61 |  | 81.3% | 0.451 | X² |
| (+) | n-% | 21 |  | 23.3% |  | 14 |  | 16.3% |  | 13 |  | 17.3% |
| COPD | (-) | n-% | 80 |  | 88.9% |  | 77 |  | 89.5% |  | 71 |  | 94.7% | 0.385 | X² |
| (+) | n-% | 10 |  | 11.1% |  | 9 |  | 10.5% |  | 4 |  | 5.3% |
| DM | (-) | n-% | 76 |  | 84.4% |  | 76 |  | 88.4% |  | 64 |  | 85.3% | 0.736 | X² |
| (+) | n-% | 14 |  | 15.6% |  | 10 |  | 11.6% |  | 11 |  | 14.7% |
| Others | (-) | n-% | 86 |  | 95.6% |  | 86 |  | 100.0% |  | 72 |  | 96.0% |  |  |
| (+) | n-% | 4 |  | 4.4% |  | 0 |  | 0.0% |  | 0 |  | 0.0% |
| K Kruskal-Wallis test / X² Ki-Kare test | | | | | | | | | | | | | | | |

|  |  |  |  |  | |  | |  | | |  |  | | |  |  | | |  |  | | |  |  | | |  | |  |
| --- | --- | --- | --- | --- | --- | --- | --- | --- | --- | --- | --- | --- | --- | --- | --- | --- | --- | --- | --- | --- | --- | --- | --- | --- | --- | --- | --- | --- | --- |
|  |  | | |  | |  | |  | | |  |  | | |  |  | | |  |  | | |  |  | | |  | |  |
|  |  |  |  | PCA | | | | | | |  | Chronic Inflammation | | | | | | |  | BPH | | | | | | | p | | |
|  | PSA | Avg.±ss | | 6,2 | | ± | | 2,2 | | |  | 6,6 | | | ± | 2,3 | | |  | 6,1 | | | ± | 2,2 | | | 0,201 | | K |
|  | Medyan | | 5,9 | | | | | | |  | 6,4 | | | | | | |  | 5,7 | | | | | | |
|  | PV | Avg.±ss | | 48,0 | | ± | | 28,2 | | |  | 58,4 | | | ± | 29,0 | | |  | 62,5 | | | ± | 32,3 | | | ***0,000*** | | K |
|  | Medyan | | 40,0 | | | | | | |  | 51,0 | | | | | | |  | 55,0 | | | | | | |
|  | K Kruskal-Wallis test | | | | | | | | | | | | | | | | | | | | | | | | | | | | |
|  |  |  |  |  | |  | |  | | |  |  | | |  |  | | |  |  | | |  |  | | |  | |  |
|  |  | | |  |  | |  | |  |  | | |  |  | | |  |  | | |  |  | | |  |  | |
|  |  |  |  | PCA | | | | |  | Chronic Inflammation | | | | | | |  | BPH | | | | | | | p | | |
|  | Serum CRP | Avg.±ss | | 1,22 | ± | | 0,64 | |  | 1,11 | | | ± | 0,58 | | |  | 1,19 | | | ± | 0,54 | | | 0,152 | K | |
|  | Medyan | | 1,06 | | | | |  | 0,95 | | | | | | |  | 1,04 | | | | | | |
|  | Urine CRP | Avg.±ss | | 1,20 | ± | | 0,51 | |  | 1,19 | | | ± | 0,29 | | |  | 1,19 | | | ± | 0,29 | | | 0,480 | K | |
|  | Medyan | | 1,10 | | | | |  | 1,16 | | | | | | |  | 1,15 | | | | | | |
|  | K Kruskal-Wallis test | | | | | | | | | | | | | | | | | | | | | | | | | | |
|  |  |  |  |  |  | |  | |  |  | | |  |  | | |  |  | | |  |  | | |  |  | |
|  |  |  |  |  |  | |  | |  |  | | |  |  | | |  |  | | |  |  | | |  |  | |
